# Novel Compound Heterozygous *TMC1* Mutations Associated with Autosomal Recessive Hearing Loss in a Chinese Family

Xue Gao<sup>1,2,3,9</sup>, Yu Su<sup>1,9</sup>, Li-Ping Guan<sup>4,9</sup>, Yong-Yi Yuan<sup>1</sup>, Sha-Sha Huang<sup>1</sup>, Yu Lu<sup>1</sup>, Guo-Jian Wang<sup>1</sup>, Ming-Yu Han<sup>1,2</sup>, Fei Yu<sup>1</sup>, Yue-Shuai Song<sup>1,2</sup>, Qing-Yan Zhu<sup>4</sup>, Jing Wu<sup>5</sup>, Pu Dai<sup>1,2\*</sup>

**1** Department of Otorhinolaryngology, Head and Neck Surgery, PLA General Hospital, Beijing, P. R. China, **2** Department of Otorhinolaryngology, Hainan Branch of PLA General Hospital, Sanya, P. R. China, **3** Department of Otorhinolaryngology, the Second Artillery General Hospital, Beijing, P. R. China, **4** BGI-Shenzhen, Beishan Industrial Zone, Yantian District, Shenzhen, P. R. China, **5** BGI-Tianjin, Tianjin, P. R. China

## Abstract

Hereditary nonsyndromic hearing loss is highly heterogeneous and most patients with a presumed genetic etiology lack a specific diagnosis. It has been estimated that several hundred genes may be associated with this sensory deficit in humans. Here, we identified compound heterozygous mutations in the *TMC1* gene as the cause of recessively inherited sensorineural hearing loss by using whole-exome sequencing in a family with two deaf siblings. Sanger sequencing confirmed that both siblings inherited a missense mutation, c.589G>A p.G197R (maternal allele), and a nonsense mutation, c.1171C>T p.Q391X (paternal allele), in *TMC1*. We also used DNA from 50 Chinese familial patients with ARNSHL and 208 ethnicity-matched negative samples to perform extended variants analysis. Both variants co-segregated in family 1953, which had the hearing loss phenotype, but were absent in 50 patients and 208 ethnicity-matched controls. Therefore, we concluded that the hearing loss in this family was caused by novel compound heterozygous mutations in *TMC1*.

**Citation:** Gao X, Su Y, Guan L-P, Yuan Y-Y, Huang S-S, et al. (2013) Novel Compound Heterozygous *TMC1* Mutations Associated with Autosomal Recessive Hearing Loss in a Chinese Family. PLoS ONE 8(5): e63026. doi:10.1371/journal.pone.0063026

**Editor:** Andreas R. Janecke, Innsbruck Medical University, Austria

**Received:** February 13, 2013; **Accepted:** March 27, 2013; **Published:** May 14, 2013

**Copyright:** © 2013 Gao et al. This is an open-access article distributed under the terms of the Creative Commons Attribution License, which permits unrestricted use, distribution, and reproduction in any medium, provided the original author and source are credited.

**Funding:** This work was supported by grants from the Project of the National Natural Science Foundation of China (Grant Nos. 30801285, 31071099, 81230020, 81200751, 81070792, 81000414, 81070792, 81000415), a grant from State 863 High Technology R&D Key Project of China (2011AA02A112), a grant from Natural Science Foundation of Beijing (Grant No 7122172), a grant from Minister of Science and Technology of China (2012BAI09B02) and a grant from Minister of Health of China (201202005). The funders had no role in study design, data collection and analysis, decision to publish, or preparation of the manuscript.

**Competing Interests:** The authors have declared that no competing interests exist.

\* E-mail: daipu301@vip.sina.com

<sup>9</sup> These authors contributed equally to this work.

## Introduction

Hearing loss is a common sensory defect that can significantly impact quality of life, and the majority of congenital cases of hearing loss are attributable to genetic factors [1]. Non-syndromic hereditary forms, in which the hearing loss is the only clinical sign, are genetically heterogeneous. Autosomal recessive nonsyndromic hearing loss (ARNSHL) is the most common type and accounts for ~80% of cases of inherited hearing loss. To date, 61 genes and more than 100 genetic loci have been implicated in ARNSHL (<http://hereditaryhearingloss.org/>). The marked heterogeneity of genetic hearing loss can be explained by the complexity of the auditory system, which requires coordination of multiple processes involving the inner ear and nervous system. A defect in any part of this complex chain of events can lead to hearing impairment. However, despite previous intensive linkage analysis and candidate gene screening, a large proportion of ARNSHL remain genetically unexplained.

Next-generation sequencing, in particular whole-exome sequencing (WES) involving the targeted sequencing of the protein-coding subset of the human genome, has become a highly efficient strategy for identifying novel causative genes and mutations involved in heritable disease. Both simple nonsyndromic and

complex syndromic forms of hearing loss can be resolved efficiently using WES, especially small families with distinct and interesting phenotypes that are too small to map [2,3]. To date, nine syndromic or nonsyndromic deafness genes have been identified using targeted genomic enrichment and next-generation sequencing including *TPRN*, *GPSM2*, *CEACAM16*, *SMPX*, *HSD17B4*, *HARS2*, *MASPI*, *DNMT1*, *TSPEAR* [4,5,6,7,8,9,10,11,12].

*TMC1* is predicted to be involved in the functional maturation of cochlear hair cells [13]. The precise function of the *TMC1* protein in the inner ear is unknown although its expression is localized to outer hair cells of the mouse inner ear after P3 [14]. Mutations in this gene at the DFNA36 and DFNB7/11 loci have previously been reported to cause nonsyndromic autosomal dominant and recessive hearing loss, respectively [15]. *TMC1* mutations are the sixth most common causes of ARNSHL in populations from North Africa, the Middle East, and India [16,17,18,19]. To date, 35 recessive mutations in *TMC1* were shown to be associated with ARNSHL at the DFNB7/11 locus in more than 40 families worldwide (Table 1). However, these mutations were not found in Chinese populations. Almost all reported recessive cases showed a similar phenotype characterized by prelingual severe-to-profound hearing loss.

**Table 1.** Overview of all *TMC1* mutations identified to date.

| Origin                               | MutationDNA          | Protein      | Exon(E)/Intron(I) | Type of variant      | Inheritance pattern | Reference        |
|--------------------------------------|----------------------|--------------|-------------------|----------------------|---------------------|------------------|
| North America                        | c. 1714 G>A          | p. D572N     | E19               | Missense             | AD                  | [15,24,29]       |
| North America                        | c. 1714 G>C          | p. D572H     | E19               | Missense             | AD                  | [30]             |
| China                                | c.589G>A             | p.G197R      | E11               | Missense             | AR                  | Present study    |
| China                                | c.1171C>T            | p.Q391X      | E15               | Nonsense             | AR                  | Present study    |
| PakistanTunisia Lebanon JordanTurkey | c. 100 C>T           | p. R34X      | E7                | Nonsense             | AR                  | [15,19,24,30,31] |
| Pakistan                             | c. IVS3_IVS5         | n.d.         | E5                | Deletion             | AR                  | [15]             |
| PakistanIndia                        | c. 295_296 delA      | n.d.         | E8                | Deletion             | AR                  | [15]             |
| Pakistan                             | c. IVS10-8T>A        | n.d.         | I10               | Splice site mutation | AR                  | [15]             |
| Pakistan                             | c. IVS13+1G>A        | n.d.         | I13               | Splice site mutation | AR                  | [15,32]          |
| Turkey                               | c. 776 A>G           | p. Y259C     | E13               | Missense             | AR                  | [25]             |
| Turkey                               | c.821C>T             | p.P274L      | E13               | Missense             | AR                  | [25]             |
| Turkey                               | c. 1083_1087delCAGAT | p.R362PfsX6  | E15               | Deletion             | AR                  | [25]             |
| TurkeyPakistan                       | c. 1334 G>A          | p. R455H     | E16               | Missense             | AR                  | [25,32]          |
| Pakistan                             | c. 1534C>T           | p. R512X     | E17               | Nonsense             | AR                  | [15]             |
| India                                | c.1960A>G            | p.M654V      | E20               | Missense             | AR                  | [15]             |
| Pakistan                             | c.884+1G>A           |              | E13               | Splice site mutation | AR                  | [15]             |
| Pakistan                             | c.830A>G             | p.Y277C      | E13               | Missense             | AR                  | [32]             |
| Pakistan                             | c.536-8T>A           |              | E11               | Splice site mutation | AR                  | [32]             |
| Pakistan                             | c.1114G>A            | p.V372M      | E15               | Missense             | AR                  | [32]             |
| Pakistan                             | c.2004T>G            | p.S668R      | E21               | Missense             | AR                  | [32]             |
| Pakistan                             | c.2035G>A            | p.E679K      | E21               | Missense             | AR                  | [32]             |
| SudanTunisiaLebanonJordan            | c.1165C>T            | p.R389X      | E15               | Nonsense             | AR                  | [18,24,31]       |
| Sudan                                | c.IVS19+5G>A         | n.d.         | I19               | Splice site mutation | AR                  | [18]             |
| Pakistan                             | c. 1541C>T           | p.P514L      | E17               | Missense             | AR                  | [17]             |
| Pakistan                             | c.1543T>C            | p.C515R      | E17               | Missense             | AR                  | [17]             |
| Pakistan                             | c.IVS5+1G>T          | Splice Site  | I5                | Splice site mutation | AR                  | [17]             |
| Greece                               | c.2350C>T            | p.R604X      | E20               | Nonsense             | AR                  | [24]             |
| Iran                                 | c.776+1G>A           | Splice Site  | E7                | Splice site mutation | AR                  | [24]             |
| Turkey                               | c.767delT            | p.F255FfsX14 | E13               | Deletion             | AR                  | [24]             |
| Turkey                               | c.1166G>A            | p.R389Q      | E15               | Missense             | AR                  | [24]             |
| Tunisia                              | c.1764G>A            | p.W588X      | E19               | Nonsense             | AR                  | [31]             |
| Turkey                               | c.1330G>A            | p.G444R      | E16               | Missense             | AR                  | [19]             |
| Turkey                               | c.1333C>T            | p.G445R      | E16               | Missense             | AR                  | [19]             |
| Turkey                               | c.2030T>C            | p.I667T      | E21               | Missense             | AR                  | [19]             |
| Turkey                               | c.IVS6+2T>A          | Splice Site  | I6                | Splice site mutation | AR                  | [19]             |
| Turkey                               | c.1685_2280 del      |              | E19–24            | Deletion             | AR                  | [19]             |
| The Netherlands                      | c.1763+3A>G          | p.W588WfsX81 | I19               | Splice site mutation | AR                  | [16]             |

AD, Autosomal Dominant; AR, Autosomal Recessive.  
doi:10.1371/journal.pone.0063026.t001

Here, we report a family with two siblings affected by sensorineural hearing loss. Mutations in *G7B2* and *SLC26A4* were excluded previously. As the family is small and non-consanguin-

ous, neither linkage analysis nor homozygosity mapping would have been informative in identifying the causative gene. Therefore, we used WES to identify the gene responsible for the disease

in this family. WES was carried out in two affected siblings, followed by validation in the family. The results identified two compound heterozygous disease-segregating mutations, c.589G>A (p.G197R) and c.1171C>T (p.Q391X), in the *TMC1* gene. To exclude the possibility that these mutations were polymorphisms, DNA samples of 50 affected and 208 unaffected individuals were also analyzed.

## Materials and Methods

### Clinical Data

Family 1953 is a two-generation Chinese family with autosomal recessive prelingual non-syndromic sensorineural hearing loss. To screen for candidate mutations, we used 208 ethnicity-matched controls and 50 affected DNA samples from the Department of Otolaryngology, Head and Neck Surgery, Chinese PLA General Hospital. The fifty affected individuals were from families presenting with ARNSHL and in whom mutations of *G7B2* and *SLC26A4* had been excluded previously. Fully informed written consent was attained from each subject or their guardians. The study was approved by the Chinese PLA General Hospital Research Ethics Committee. Medical histories of the members of family 1953 were obtained using a questionnaire regarding the following aspects of this condition: subjective degree of hearing loss, age at onset, progression, symmetry of the hearing impairment, use of hearing aids, presence of tinnitus, medication, noise exposure, pathological changes in the ear, and other relevant clinical manifestations. Otoscopy, physical examination, and pure tone audiometric examination (at frequencies from 250 to 8000 Hz) were performed to identify the phenotype. Immittance testing was applied to evaluate middle-ear pressure, ear canal volumes, and tympanic membrane mobility. Unaffected phenotype status was defined by threshold lower than age- and gender-matched 50<sup>th</sup> percentile values for all frequencies measured. Computed tomography (CT) scan of the temporal bone was performed. The diagnosis of profound sensorineural hearing impairment was made according to the ICD-10 criteria based on audiometric examination. Tandem gait and Romberg tests were performed to evaluate balance.

All genomic DNA was extracted from peripheral blood using a blood DNA extraction kit according to the protocol provided by the manufacturer (TianGen, Beijing, China).

### Targeted Gene Capture and Sequencing

Approximately 99.71% of CCDS exons or 99.62% of RefSeq exons from 6 µg of genomic DNA were captured using the NimblegenSeqCap EZ Library (44 Mb for II:1 and II:2). Genomic DNA sample was randomly fragmented by Covaris; the size of the library fragments was distributed mainly between 250 and 300 bp. Then, adapters were ligated to both ends of the resulting fragments. Extracted DNA was then amplified by ligation-mediated PCR (LM-PCR), purified, and hybridized to the NimblegenSeqCap EZ Library for enrichment; non-hybridized fragments were then washed out. Both non-captured and captured LM-PCR products were subjected to quantitative PCR to estimate the magnitude of enrichment. Each captured library was then loaded onto the Illumina HiSeq2000 platform, and we performed high-throughput sequencing for each captured library to ensure that each sample met the desired average sequencing depth. Raw image files were processed by Illumina base calling Software 1.7 for base calling with default parameters and the sequences of each individual were generated as 90-bp pair-end reads.

### Reads, Mapping, and Variant Detection

SNP detection was performed as follows: (i) SOAPaligner (version 2.21) [20] was used to align the high-quality reads to the human reference genome (hg19, NCBI build 37.1); (ii) for paired-end reads with duplicated start and end sites, only one copy with the highest quality was retained, and the reads with adapters were removed; (iii) SOAPsnp (version 1.05) [21] was used to assemble the consensus sequence and call genotypes. For SNP quality control, low-quality SNPs that met one of the four following criteria were filtered out: (i) genotype quality less than 20; (ii) sequencing depth of less than 4 for the site; (iii) estimated copy number more than 2; (iv) distance from the adjacent SNPs less than 5 bp. Small indel detection was performed using the UnifiedGenotyper tool from GATK (version v1.0.4705) [22] after all the high-quality reads were aligned to the human reference genome using BWA (version 0.5.9-r16) [23]. SNP and indel detection were performed only on the targeted exome regions and flanking regions within 200 bp.

### Filtering and Annotation

The detected variants were annotated and filtered based on four databases; *i.e.*, NCBI CCDS (<http://www.ncbi.nlm.nih.gov/CCDS/CcidsBrowse.cgi>), RefSeq (<http://www.ncbi.nlm.nih.gov/RefSeq/>), Ensembl (<http://www.ensembl.org>), and Encode (<http://genome.ucsc.edu/ENCODE>). Four major steps were taken to prioritize all the high-quality variants: (i) variants within intergenic, intronic, and UTR regions and synonymous mutations were excluded from downstream analysis; (ii) variants in dbSNP132 (<http://www.ncbi.nlm.nih.gov/projects/SNP/>), 1000 Genome project (<ftp://ftp.1000genomes.ebi.ac.uk/vol1/ftp>), YH Database (<http://yh.genomics.org.cn/>), and HapMap Project (<ftp://ftp.ncbi.nlm.nih.gov/hapmap>) were excluded; (iii) Possible impacts of variants were predicted by SIFT (<http://sift.bii.a-star.edu.sg/>) and Polyphen2 (<http://genetics.bwh.harvard.edu/pph2/>); (iv) Gene Ontology (<http://www.geneontology.org>) and KEGG Pathway Annotations (<http://www.ebi.ac.uk/cluster>) were used.

### Mutation Validation

After filtering against multiple databases, Sanger sequencing was used to determine if any of the potential novel mutations in known causative genes of ARNSHL co-segregated with the disease phenotype in this family. Direct polymerase chain reaction (PCR) products were sequenced using BigDye terminator v3.1 cycle sequencing kits (Applied Biosystems, Foster City, CA) and analyzed using an ABI 3700XL Genetic Analyzer.

### Mutational Analysis

Segregation of the mutations was studied in all family members. In addition, 208 negative samples and 50 ARNSHL families were also screened for the mutations by direct sequencing. Genotyping for c.589G>A and c.1171C>T was performed by PCR (primer sequences are available on request) and detected by bidirectional sequencing of the amplified fragments using an automated DNA sequencer (ABI 3100, Applied Biosystems). Nucleotide alteration(s) were identified by sequence alignment with the *TMC1* GenBank sequence using Genetool software.

### Multiple Sequence Alignment

Multiple sequence alignment was performed using Homologene with the default settings and the sequences NP\_619636.2 (*H. sapiens*), XP\_001093188.2 (*M. mulatta*), XP\_528322.2 (*P. troglodytes*), XP\_002689695.1 (*B. taurus*), XP\_541284.3 (*C. lupus*), NP\_083229.1

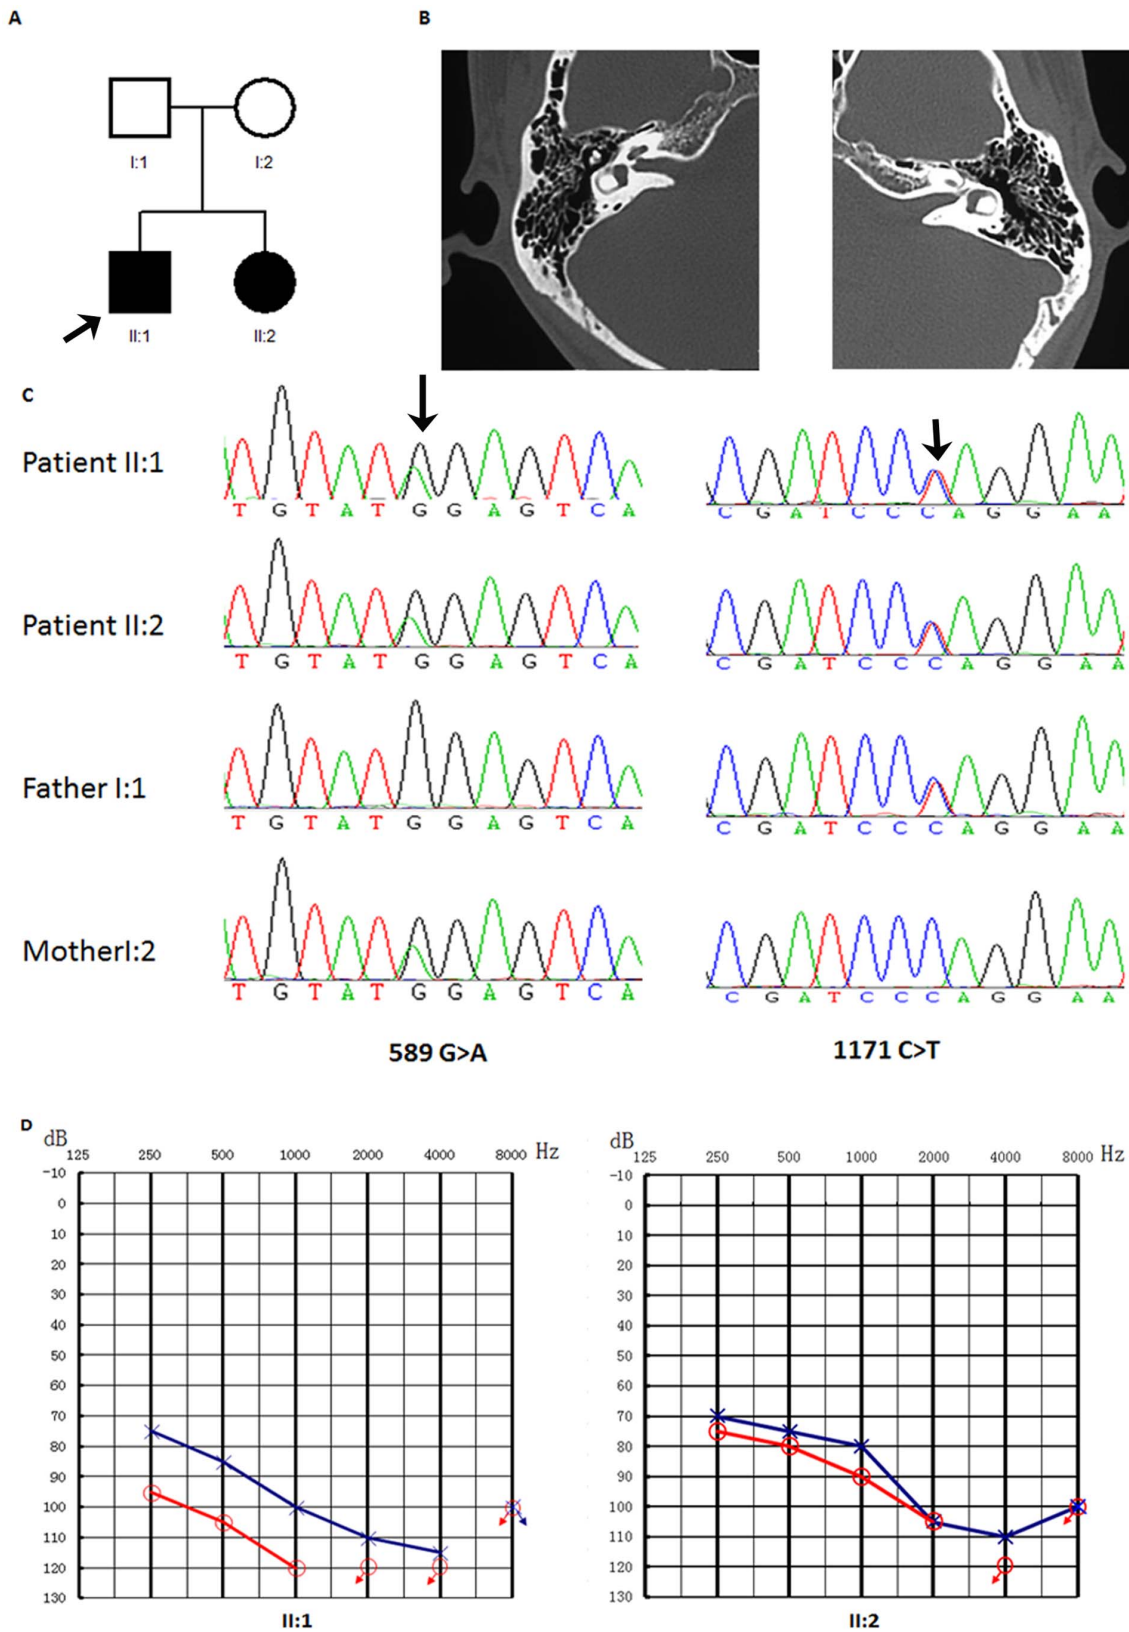

**Figure 1. Combined figure.** A. Pedigree of Family 1953 with ARNSHL. Affected subjects are denoted in black. Arrow indicates the proband; B. temporal bone CT of the II:1 shows no structural change; C. Electropherograms analysis of *TMC1* in family 1953 showing the compound heterozygous mutations (c.589G>A and c.1171C>T) co-segregated with the phenotype. D. Audiogram of affected subjects showed hearing loss ranged from severe to profound.

doi:10.1371/journal.pone.0063026.g001

**Table 2.** Candidate SNP calls identified in 2 affected siblings.

| Chr:Position | Gene   | Mutation | Mode         | Mutation type | Maternal allele | Paternal allele | SIFT/Polyphen2             | Expressed in inner ear | Deafness gene | frequencies in the Exome variant Server |
|--------------|--------|----------|--------------|---------------|-----------------|-----------------|----------------------------|------------------------|---------------|-----------------------------------------|
| 1:16354325   | CLCNKA | 791C>A   | heterozygous | missense      | Yes             | Yes             | Damaging/Benign            | Yes                    | N/A           | N/A                                     |
| 1:16360198   | CLCNKA |          | heterozygous | 5'-UTR        | Yes             |                 | N/A                        | Yes                    | N/A           | N/A                                     |
| 16:21747633  | OTOA   | 2353a>c  | heterozygous | missense      | Yes             |                 | Tolerated/Benign           | Yes                    | Yes           | N/A                                     |
| 16:21747639  | OTOA   | 2359g>t  | heterozygous | nonsense      | Yes             |                 | Damaging/possibly damaging | Yes                    | Yes           | N/A                                     |
| 9:75366819   | TMC1   | 589g>a   | heterozygous | missense      | Yes             |                 | Damaging/possibly damaging | Yes                    | Yes           | N/A                                     |
| 9:75404180   | TMC1   | 1171c>t  | heterozygous | nonsense      | Yes             | Yes             | Damaging/possibly damaging | Yes                    | Yes           | N/A                                     |

doi:10.1371/journal.pone.0063026.t002

(*M. musculus*), NP\_001101991.1 (*R. norvegicus*), NP\_001006580.1 (*G. gallus*), and XP\_695621.3 (*D. rerio*). ([http://www.ncbi.nlm.nih.gov/homologene?cmd=Retrieve&dopt=MultipleAlignment&list\\_uids=23670](http://www.ncbi.nlm.nih.gov/homologene?cmd=Retrieve&dopt=MultipleAlignment&list_uids=23670)).

**Results**

**Clinical Presentation of Family 1953**

We analyzed a two-generation ARNSHL family (family 1953) including two affected siblings (16 and 24 years old) and unaffected parents (Figure 1A). Audiograms of the two affected siblings showed that the hearing loss was bilateral, severe to profound, with some residual hearing at low frequency (Figure 1D). The stable nature of hearing loss was reported by the affected individuals but was not verified with audiograms. Immittance testing demonstrated normal and bone conduction values equal to the air conduction measurements, suggesting a sensorineural hearing impairment. Affected individuals did not have delays in gross motor development; neither did they have balance problems, vertigo, dizziness, nor spontaneous and positional nystagmus. Tandem walking was normal and Romberg test was negative. CT scan of the temporal bone in the proband excluded inner-ear malformations (Figure 1B). The parents reported no history of stillbirth or miscarriage. Physical examination of all members revealed no signs of systemic illness or dysmorphic features. The remaining examination results were completely normal. Affected individuals did not have delayed gross motor development. This phenotype is consistent with that reported previously for DFNB7/11 [15,19,24]. To exclude mutations in the genes commonly known to be associated with hereditary hearing loss, *SLC26A4* and *GJB2* were sequenced in the proband (patient II:1 in Figure 1A). No mutations were found in these genes and we proceeded to sequence the whole exomes of the two patients.

**Whole-exome Sequencing**

By WES of the proband II:1 and proband II:2, we generated 6.4 and 5.9 billion bases of sequence with mean target region depths of 61.93 and 66.68, respectively. Approximately 99% and 98.98% (2739 Mb and 2942 Mb in length, respectively) of the targeted bases were covered sufficiently to pass our thresholds for calling SNPs and short insertions or deletions (indels). The rates of nucleotide mismatch were 0.37% and 0.36%, respectively. After identification of variants, we focused only on non-synonymous variants (NS), splice acceptor and donor site mutations (SS), and frameshift coding insertions of deletions (indels), which were more likely to be pathogenic than others, especially those in homozygous or multiple heterozygous mode.

In II:1 and II:2, we separately identified 12192 and 12395 SNPs in the coding regions (11975 and 12171 missense, 72 and 74 readthrough, 145 and 150 nonsense), 2527 and 2557 variants in introns that may affect splicing (within 10 bp of the intron/exon junction), respectively. Then we compared these variants in two affected members with the dbSNP135, HapMap project, 1000 Genome Project, and YH database. Under the autosomal recessive model, we identified 113 genes with homozygous or multiple heterozygous variants (216 SNPs and 59 indels) common to both affected siblings. Then, we compared these variants with reported Nonsyndromic Hereditary Hearing Loss genes (<http://hereditaryhearingloss.org/>), in which six mutations were found in previously reported deafness-related genes (Table 2).

**Mutation Detection and Analysis**

SIFT and Polyphen2 were used as a first-pass filter to predict how the identified amino acid substitutions would affect protein

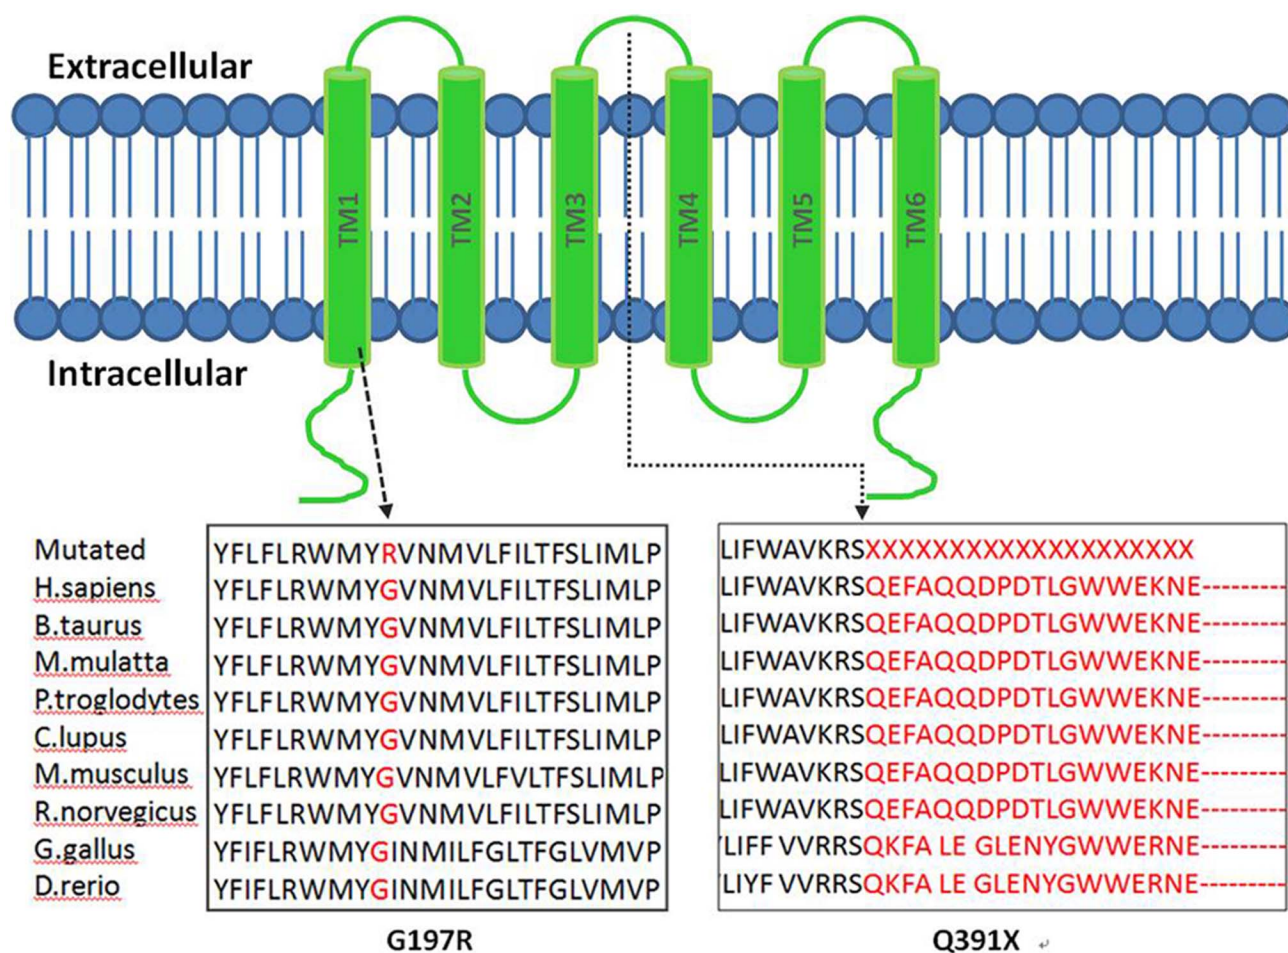

**Figure 2. Schematic structure of TMC1 and Conservation analysis.** G197R occur in the second TMhelix, Q391X occur extracellular between TM3 and TM4. Protein alignment showed conservation of residues TMC1 G197 and Q391 across nine species. These two mutations occur at an evolutionarily conserved amino acid (in red). doi:10.1371/journal.pone.0063026.g002

function taking into account sequence homology and the physical properties of amino acids. Two novel mutations in the previously described pathogenic gene *TMC1* were predicted to be damaging: *TMC1* c.589G>A (G197R) and *TMC1* c.1171G>A (Q391X) (according to GenBank accession number NM\_138691.2). The mutation c.589G>A located within exon 11 and predicted to lie within hydrophobic transmembrane domains changes a hydrophilic glycine to a hydrophobic alanine at position 197, and may lead to a change in protein tertiary structure. Mutation c.1171G>A located within exon 15 results in the nonsense mutation Q391X, and the premature stop codon is likely to activate the nonsense-mediated mRNA decay response, thus leading to a decrease in *TMC1* mRNA expression.

Both amino acid changes affect highly preserved residues (Figure 2). Sanger sequencing validated the two affected siblings' mutations and demonstrated that the parents were unaffected carriers of G197R (mother) and Q391X (father) deletion, showing complete co-segregation of the mutations with the phenotype (Figure 1C).

By direct sequencing, 208 ethnicity-matched negative controls and 50 Chinese familial patients with ARNSHL were genotyped to screen for the mutations. The two mutations described above were absent in 208 negative samples and in 50 ARNSHL families.

These data, together with the clinical presentation of the two affected siblings, indicate clearly that *TMC1* mutations were responsible for ARNSHL in this family.

We used TMHMM2.0 to predict the *TMC1* protein with six membrane-spanning regions and cytoplasmic N- and C-termini. The result indicated that G197R occurs in the second TM helix, while Q391X occurs in the extracellular region between TM3 and TM4 (Figure 2). This predicted model of *TMC1* membrane topology was similar to those of ion channels or transporters.

## Discussion

For many decades, linkage analysis has been the most powerful and widely used strategy to identify the gene defects responsible for inherited disorders. However, this approach is time consuming, and requires the availability of cohorts of homogeneous and informative families. Homozygosity mapping is a potentiated version of linkage analysis, which makes possible the identification of several dozens genes responsible for autosomal recessive diseases, but it requires the availability of informative, possibly large, consanguineous families. As the molecular basis of deafness in most of our Chinese probands was unsolved, we predict that many new hearing loss genes and mutations remain to be identified. Next-generation sequencing can now be performed

rapidly and at minimal cost, allowing analysis of the coding regions (exome) of the human genome in single individuals or small families, including patients in whom a clear genotype-phenotype correlation is absent or for clinically and genetically heterogeneous conditions. WES provides unprecedented opportunities to identify causative DNA mutations in rare heritable disorders.

This represents the first report of novel compound heterozygous mutations in the *TMC1* gene as a cause of ARNSHL. The *TMC1* gene on chromosome 9q12 contains 24 exons, including four exons encoding sequence upstream of a methionine codon in exon 5, and normally encodes a product of 760 amino acids. *TMC1* mutations seem to be rather common causes of recessive deafness in India, Pakistani, Turkish, and Tunisian families [15,19,25].

*TMC1* is predicted to contain six transmembrane domains, and both C- and N-termini are located intracellularly; this protein exhibits no apparent amino acid sequence similarity to any other proteins of known function. Expression analysis of *TMC1* resulted in detection of transcripts in human fetal cochlea and mouse inner and outer cochlear hair cells as well as in neurosensory epithelia of the vestibular organs [15], and is required for postnatal hair cell development and maintenance [14].

*Tmc1* deficiency in the recessive deafness mouse mutant *dn* leads to complete deafness and hair cell degeneration, suggesting that *Tmc1* is necessary for maturation and survival of hair cells in the murine cochlea.

Mouse models with the *Tmc1* defect [14,15] support a role for *Tmc1* in the inner and outer hair cells, either in proper trafficking of other membrane proteins in these cells or in regulating the differentiation of immature hair cells into fully functional auditory receptors [13]. This model suggested that mechanical forces brought about by bending of stereocilia and tension on the tip links directly activate ion channels. If *TMC1* is an ion channel that is mainly localized in the IHC, then it may be involved in the most basic auditory process of hair cell transduction.

The predicted structure of *TMC1* bears similarity to that of the  $\alpha$ -subunit of voltage-dependent  $K^+$  channels, which have six  $\alpha$ -helical TM segments and intracellular N- and C-termini [26]. *TMC1* has been predicted to be an ion channel or transporter that mediates  $K^+$  homeostasis in the inner ear [27]. Ion channels serve many functions, including the transport of ions and water, the control of electrical excitability, and the regulation of ionic homeostasis. The first four TM domains of the  $K^+$  channel  $\alpha$ -

subunit act as voltage sensors for activation gating [28], whereas the intervening segment between TM5 and TM6 appears to confer channel selectivity [26]. *TMC1* c.589G>A (G197R) lies in TM2 and c.1171G>A (Q391X) lies between TM3 and TM4 extracellularly, and the mutations may affect an ion channel function in hair cells.

The stop codon in exon 15 (c.1171G>A [Q391X]) identified in this study is close to the previously reported mutation c.1165G>A [Q389X], and is predicted to result in formation of a truncated protein with impaired function [18].

In summary, we have reported the clinical and genetic characteristics of a non-consanguineous Chinese family with ARNSHL by WES. A major challenge for mutation discovery by WES is determining which variants are potentially causative and which are likely to be benign. To identify pathogenic variants, we consecutively filtered these variants by subjecting them to an analytical pipeline for high-confidence variant calling and annotation and identified novel compound heterozygous mutations in *TMC1*. The identification of additional mutations in *TMC1* further confirms its crucial role in auditory function. These results support sequence analysis of *TMC1* in clinical diagnostic testing of individuals with ARNSHL, as families with an affected child both parents of which are carriers have a 25% risk of recurrence. Moreover, pre-implantation genetic diagnosis is possible.

The English in this document has been checked by at least two professional editors, both native speakers of English. For a certificate, please see: <http://www.textcheck.com/certificate/KuK2Ub>.

## Acknowledgments

We sincerely thank all the family members for their participation and cooperation in this study. We are also grateful to Dr. Guangchun Bai of Albany Medical College, New York State Department of Health for his valuable comments and suggestions.

## Author Contributions

Conceived and designed the experiments: PD XG. Performed the experiments: XG YS SSH YL. Analyzed the data: XG LPG QYZ JW YYY. Contributed reagents/materials/analysis tools: GJW MYH FY YSS. Wrote the paper: XG PD.

## References

- Morton CC, Nance WE (2006) Newborn hearing screening—a silent revolution. *N Engl J Med* 354: 2151–2164.
- Shearer AE, Hildebrand MS, Sloan CM, Smith RJ (2011) Deafness in the genomics era. *Hear Res* 282: 1–9.
- Brownstein Z, Bhonker Y, Avraham KB (2012) High-throughput sequencing to decipher the genetic heterogeneity of deafness. *Genome Biol* 13: 245.
- Delmaghani S, Aghaie A, Michalski N, Bonnet C, Weil D, et al. (2012) Defect in the gene encoding the EAR/EPTP domain-containing protein TSPEAR causes DFNB98 profound deafness. *Hum Mol Genet* 21: 3835–3844.
- Li Y, Pohl E, Boulouiz R, Schraders M, Numberg G, et al. (2010) Mutations in TPRN cause a progressive form of autosomal-recessive nonsyndromic hearing loss. *Am J Hum Genet* 86: 479–484.
- Walsh T, Shahin H, Elkan-Miller T, Lee MK, Thornton AM, et al. (2010) Whole exome sequencing and homozygosity mapping identify mutation in the cell polarity protein GSPM2 as the cause of nonsyndromic hearing loss DFNB82. *Am J Hum Genet* 87: 90–94.
- Zheng J, Miller KK, Yang T, Hildebrand MS, Shearer AE, et al. (2011) Carcinoembryonic antigen-related cell adhesion molecule 16 interacts with alpha-tectorin and is mutated in autosomal dominant hearing loss (DFNA4). *Proc Natl Acad Sci U S A* 108: 4218–4223.
- Schraders M, Haas SA, Weegerink NJ, Oostrik J, Hu H, et al. (2011) Next-generation sequencing identifies mutations of SMPX, which encodes the small muscle protein, X-linked, as a cause of progressive hearing impairment. *Am J Hum Genet* 88: 628–634.
- Pierce SB, Walsh T, Chisholm KM, Lee MK, Thornton AM, et al. (2010) Mutations in the DBP-deficiency protein HSD17B4 cause ovarian dysgenesis, hearing loss, and ataxia of Perrault Syndrome. *Am J Hum Genet* 87: 282–288.
- Pierce SB, Chisholm KM, Lynch ED, Lee MK, Walsh T, et al. (2011) Mutations in mitochondrial histidyl tRNA synthetase HARS2 cause ovarian dysgenesis and sensorineural hearing loss of Perrault syndrome. *Proc Natl Acad Sci U S A* 108: 6543–6548.
- Sirmaci A, Walsh T, Akay H, Spiliopoulos M, Sakalar YB, et al. (2010) MASP1 mutations in patients with facial, umbilical, coccygeal, and auditory findings of Carnevale, Malpuech, OSA, and Michels syndromes. *Am J Hum Genet* 87: 679–686.
- Klein CJ, Botuyan MV, Wu Y, Ward CJ, Nicholson GA, et al. (2011) Mutations in DNMT1 cause hereditary sensory neuropathy with dementia and hearing loss. *Nat Genet* 43: 595–600.
- Marcotti W, Erven A, Johnson SL, Steel KP, Kros CJ (2006) *Tmc1* is necessary for normal functional maturation and survival of inner and outer hair cells in the mouse cochlea. *J Physiol* 574: 677–698.
- Vreugde S, Erven A, Kros CJ, Marcotti W, Fuchs H, et al. (2002) Beethoven, a mouse model for dominant, progressive hearing loss DFNA36. *Nat Genet* 30: 257–258.
- Kurima K, Peters LM, Yang Y, Riazuddin S, Ahmed ZM, et al. (2002) Dominant and recessive deafness caused by mutations of a novel gene, *TMC1*, required for cochlear hair-cell function. *Nat Genet* 30: 277–284.
- de Heer AM, Collin RW, Huygen PL, Schraders M, Oostrik J, et al. (2011) Progressive sensorineural hearing loss and normal vestibular function in a Dutch

- DFNB7/11 family with a novel mutation in *TMC1*. *Audiol Neurootol* 16: 93–105.
17. Kitajiri SI, McNamara R, Makishima T, Husnain T, Zafar AU, et al. (2007) Identities, frequencies and origins of *TMC1* mutations causing DFNB7/B11 deafness in Pakistan. *Clin Genet* 72: 546–550.
  18. Meyer CG, Gasmelseed NM, Mergani A, Magzoub MM, Muntau B, et al. (2005) Novel *TMC1* structural and splice variants associated with congenital nonsyndromic deafness in a Sudanese pedigree. *Hum Mutat* 25: 100.
  19. Sirmaci A, Duman D, Ozturkmen-Akay H, Erbek S, Incesulu A, et al. (2009) Mutations in *TMC1* contribute significantly to nonsyndromic autosomal recessive sensorineural hearing loss: a report of five novel mutations. *Int J Pediatr Otorhinolaryngol* 73: 699–705.
  20. Li R, Yu C, Li Y, Lam TW, Yiu SM, et al. (2009) SOAP2: an improved ultrafast tool for short read alignment. *Bioinformatics* 25: 1966–1967.
  21. Li R, Li Y, Fang X, Yang H, Wang J, et al. (2009) SNP detection for massively parallel whole-genome resequencing. *Genome Res* 19: 1124–1132.
  22. McKenna A, Hanna M, Banks E, Sivachenko A, Cibulskis K, et al. (2010) The Genome Analysis Toolkit: a MapReduce framework for analyzing next-generation DNA sequencing data. *Genome Res* 20: 1297–1303.
  23. Li H, Durbin R (2010) Fast and accurate long-read alignment with Burrows-Wheeler transform. *Bioinformatics* 26: 589–595.
  24. Hilgert N, Alasti F, Dieltjens N, Pawlik B, Wollnik B, et al. (2008) Mutation analysis of *TMC1* identifies four new mutations and suggests an additional deafness gene at loci DFNA36 and DFNB7/11. *Clin Genet* 74: 223–232.
  25. Kalay E, Karaguzel A, Caylan R, Heister A, Cremers FP, et al. (2005) Four novel *TMC1* (DFNB7/DFNB11) mutations in Turkish patients with congenital autosomal recessive nonsyndromic hearing loss. *Hum Mutat* 26: 591.
  26. Hanlon MR, Wallace BA (2002) Structure and function of voltage-dependent ion channel regulatory beta subunits. *Biochemistry* 41: 2886–2894.
  27. Keresztes G, Mutai H, Heller S (2003) *TMC* and *EVER* genes belong to a larger novel family, the *TMC* gene family encoding transmembrane proteins. *BMC Genomics* 4: 24.
  28. Li-Smerin Y, Hackos DH, Swartz KJ (2000) alpha-helical structural elements within the voltage-sensing domains of a K(+) channel. *J Gen Physiol* 115: 33–50.
  29. Makishima T, Kurima K, Brewer CC, Griffith AJ (2004) Early onset and rapid progression of dominant nonsyndromic DFNA36 hearing loss. *Otol Neurotol* 25: 714–719.
  30. Kitajiri S, Makishima T, Friedman TB, Griffith AJ (2007) A novel mutation at the DFNA36 hearing loss locus reveals a critical function and potential genotype-phenotype correlation for amino acid-572 of *TMC1*. *Clin Genet* 71: 148–152.
  31. Tili A, Rebeh IB, Aifa-Hmani M, Dhouib H, Moalla J, et al. (2008) *TMC1* but not *TMC2* is responsible for autosomal recessive nonsyndromic hearing impairment in Tunisian families. *Audiol Neurootol* 13: 213–218.
  32. Santos RL, Wajid M, Khan MN, McArthur N, Pham TL, et al. (2005) Novel sequence variants in the *TMC1* gene in Pakistani families with autosomal recessive hearing impairment. *Hum Mutat* 26: 396.
